# Supplementary material
Source: PubMed Central journal article supplement (PMC6628818)
Supplement: pnas.1908258116.sapp.pdf [file pnas.1908258116.sapp.pdf]

Supplementary Information for

**Glucocorticoid Receptor Modulators CpdX and CpdX-D3 exhibit the same *in vivo* anti-inflammatory activities as synthetic glucocorticoids**

Guoqiang Hua, Naimah Zein, François Daubeuf, and Pierre Chambon

To whom correspondence should be addressed.

Email : [chambon@igbmc.fr](mailto:chambon@igbmc.fr)

**This PDF file includes:**

Supplementary Information Text  
Table S1  
Figs. S1 to S4

## Supplementary Information Text

### SI Materials and Methods

#### CpdX and its enantiomers

A racemic mixture of CpdX {(R/S)-5-[4-(5-fluoro-2-methoxyphenyl)-2-hydroxy-4-methyl-2-(trifluoromethyl)pentylamino]isobenzofuran-1(3H)-one} was run through a preparative supercritical fluid chromatography (SFC) AD column (250 mm \* 30 mm \* 5 µm; mobile phase: Neu-MeOH; B%: 20%-20%, 2.3 minutes). The collected fractions corresponding to the first elution peak were then concentrated under reduced pressure at 30°C, lyophilized and further purified through a Phenomenex Synergi C18 column chromatography [150 mm \* 25mm \* 10 µm; mobile phase: water (0.1 % TFA)-ACN; B%: 50%-80%, 10 minutes]. The collected fractions were concentrated under reduced pressure at 30°C and lyophilized as a white solid, the identity of which was confirmed by LCMS (MS+1=442.1) and SFC (retention time (RT) = 1.084 mins), and named as the “CpdX(eA)” enantiomer (97.6 % purity). The collected fractions corresponding to the second elution peak were similarly concentrated under reduced pressure at 30°C, lyophilized and further purified by Phenomenex Synergi C18 column chromatography [150 mm \* 25 mm \* 10 µm); mobile phase: water (0.1 % TFA)-ACN; B%: 51%-81%, 12 minutes]. The collected fractions were concentrated under reduced pressure at 30°C and lyophilized as a white solid, the identity of which was confirmed by LCMS (MS+1=442.1) and SFC (RT = 1.147 minutes), and named as the “CpdX(eB)” enantiomer with a 98% purity.

#### CpdX-D3 and its enantiomers

A racemic mixture of the deuterated compound CpdX-D3, {(R/S)-5-{4-[2-(methoxy-D3)-5-fluorophenyl]-2-hydroxy-4-methyl-2-(trifluoromethyl)pentylamino}isobenzofuran-1(3H)-one} was run through a preparative supercritical fluid chromatography (SFC) DAICEL CHIRALPAK AD-H column (250 mm \* 30 mm \* 5 µm; mobile phase: 0.1% NH<sub>3</sub>H<sub>2</sub>O-MEOH; B%: 20%-20%, 2.3 minutes). The collected fractions corresponding to the first elution peak were concentrated under reduced pressure at 30°C and lyophilized as

a white solid, the identity of which was confirmed by LCMS (MS+1=445) and SFC (RT = 1.082 minutes), and named as the enantiomer “CpdX-D3(eA)” with a 98.7 % purity. The collected fractions corresponding to the second elution peak were concentrated under reduced pressure at 30°C and lyophilized as a white solid, the identity of which was confirmed by LCMS (MS+1=445) and SFC (RT = 1.149 minutes), and named as the “CpdX-D3(eB)” enantiomer with a 99.1% purity.

### **Materials**

Dexamethasone (Dex), 12-O-Tetradecanoylphorbol-13-acetate (TPA), Calcipotriol (MC903), Lipopolysaccharide (LPS), Ovalbumin (chicken) and Dextran Sodium Sulfate (DSS) were from Sigma Aldrich. Aldara® Cream was provided from MEDA AB (Sweden). The neutral cream is composed of vaseline, liquid paraffin, Emulgade® 1000 NI (BASF), propyl gallate, sodium edetate, sorbic acid and purified water. Immunization Grade Chick Type II Collagen (7009) was from Chondrex. House dust mite extract from *dermatophaga goides pteronyssinus* was from Greer source material. TOBRADEX was from Novartis Pharma S.A.S. Biotinylated goat polyclonal anti-TSLP was from R&D Systems. Anti-Neutrophil antibody [NIMP-R14] (ab2557) was from Abcam. Anti-Eosinophil antibody (MBP) was a gift kindly provided by Dr. Mei LI (IGBMC, Illkirch, France). Anti-CD31/PECAM-1 antibody was from BD Pharmingen™- BD Biosciences (550274).

### **Topical treatments**

For all topical administration, compounds were dissolved in 100% ethanol and topically applied on both sides of the ears or on shaved dorsal skin of mice.

### **Histology and Immunohistochemistry staining**

Mouse samples were fixed overnight at 4°C in 4% paraformaldehyde and embedded in paraffin. Sections (5µm) were stained with hematoxylin and eosin. For immunohistochemistry (IHC) staining of the major basic protein (MBP) in eosinophils and NIMP-R14 in neutrophils, ears, lungs or eyelids paraffin sections were treated with 0.6% H<sub>2</sub>O<sub>2</sub> (in PBS) to block the endogenous peroxidase activity before antigen retrieval with pepsin (Invitrogen) incubated for 10 min at 37°C. Slides were then blocked with 1.5% of

normal rabbit serum (Vector Laboratories, Burlingame, Calif) and incubated with monoclonal anti-mouse MBP primary antibody (dilution 1:2000) (for IHC of MBP), or with rat monoclonal anti-NIMP-R14 primary antibody (anti-neutrophil antibody, Abcam, AB2557, dilution 1:500) (for IHC of R14), overnight at 4°C, followed by incubation with biotinylated rabbit anti-rat IgG (Vector Laboratories) for 1h at room temperature and treatment with AB complex (Vector Laboratories) for 30 min at room temperature. Staining was then visualized with AEC+ high-sensitivity substrate chromogen solution (Dako, Glostrup, Denmark).

For immunohistochemistry (IHC) staining of TSLP (13), paraffin sections were treated with citric buffer (10mmol/L citric acid, PH6) and boiled in the microwave (700W, for 2x5 min) for antigen retrieval. Slides were blocked with Streptavidin and then with a Biotin solution (Vector Laboratories) and incubated with goat polyclonal anti-TSLP antibody (Bio-TSLP, dilution 1/50), overnight at 4°C. Slides were then washed and incubated with biotinylated secondary antibody (Strep-CY3, dilution 1/400) for 1 hour at room temperature. For nucleus staining, a Dapi-Mounting medium is added (Dapi 1/100) to the slides. Staining was then visualized under a UV microscope.

### **Whole-Mount Immunostaining of cornea**

Freshly excised corneas were fixed in PFA 4% at 4°C overnight. Cornea whole-mounts were washed in PBS, blocked in 2% bovine serum albumin, immunostained with FITC-conjugated rat anti-mouse CD31/PECAM-1 antibody (1:200; BD Pharmingen™- BD Biosciences- 550274) at 4°C overnight. Specimens were then stained at room temperature for 1 hour with Cy3 goat anti-rat IgG (H+L) secondary antibody (1:200; Interchim SA laboratory), and mounted using 50µl of mounting medium with DAPI. Staining was visualized under a fluorescent microscope.

### **RNA extraction and quantitative RT-PCR**

Total RNA was extracted from either mouse ears, lungs, paws or colon with Trizol reagent (Invitrogen) according to a standard protocol. RNA was reverse transcribed by using random oligonucleotide hexamers and amplified by means of quantitative PCR with a LightCycler 480 (Roche Diagnostics) and the SYBR Green kit (Roche), according to

manufacturer's instructions. Relative RNA levels were calculated with hypoxanthine phosphoribosyl- transferase (HPRT) as an internal control. For analysis of each set of gene expression, an arbitrary value of 1 was given to the samples exhibiting the highest level, and the remaining samples were plotted relative to this value. PCR primers are available upon request.

#### **Analysis of BAL cells.**

Mouse lungs were lavaged with saline containing 1 mg/mL EDTA. The lavage fluid was centrifuged, and BAL cells were counted with a hemocytometer (Neubauer's chamber; VWR). Differential cell counts were determined using cytopsin preparations stained with Microscopy Hemacolor (Merck).

#### **Determination of airway responsiveness**

Airway responsiveness was invasively determined using a computer-controlled small animal ventilator (FlexVent<sup>®</sup> system, SCIREQ Technologies). Mice were anesthetized with xylazine (15 mg/kg, i.p.), followed 15 minutes later by an i.p. injection of pentobarbital sodium (54 mg/kg). An 18-gauge metal needle was then inserted into the trachea and each mouse was connected to the FlexVent<sup>®</sup> ventilator, and quasi-sinusoidally ventilated with a tidal volume of 10 mL/kg at a frequency of 150 breaths/minute and a positive end-expiratory pressure of 2 cm H<sub>2</sub>O in order to achieve a mean lung volume close to spontaneous breathing. After baseline measurement, mice were challenged for 10 seconds with a saline aerosol and, at 4.5-minute intervals, with 50 mg/mL methacholine. Airway resistance and elastance were expressed as cmH<sub>2</sub>O.s/mL and cmH<sub>2</sub>O/mL respectively.

Table S1: Primers used for Q-RT PCR analyses

|                 |                              |
|-----------------|------------------------------|
| mHPRT F         | 5' GTTGGATACAGGCCAGACTTTGTTG |
| mHPRT R         | 5' GATTCAACTTGCCTCATCTTAGGC  |
| mCCL4 F         | 5' GCCCTCTCTCTCTCTTGCT       |
| mCCL4 R         | 5' GTCTGCCTCTTTTGGTCAGG      |
| mMMP13 F        | 5' GTGTGGAGTTATGATGATGT      |
| mMMP13 R        | 5' TCGGATTACTCCAGATACTG      |
| mCox2 F         | 5' TTCAAAGAAGTGCTGGAAAAGGT   |
| mCox2 R         | 5' GATCATCTCTACCTGAGTGTCTTT  |
| mIL1 $\beta$ F  | 5' GCCCATCCTCTGTGACTCAT      |
| mIL1 $\beta$ R  | 5' AGGCCACAGGTATTTTGTCTG     |
| mIL6 F          | 5' GAGGATACCACTCCCAACAGACC   |
| mIL6 R          | 5' AAGTGCATCATCGTTGTTTCATACA |
| mIL4 F          | 5' GGCATTTTGAACGAGGTCAC      |
| mIL4 R          | 5' AAATATGCGAAGCACCTTGG      |
| mIL5 F          | 5' AGCACAGTGGTGAAAGAGACCTT   |
| mIL5 R          | 5' TCCAATGCATAGCTGGTGATTT    |
| mIL10 F         | 5' TGCTATGCTGCCTGCTCTTA      |
| mIL10 R         | 5' TCATTTCCGATAAGGCTTGG      |
| mIL13 F         | 5' GGAGCTGAGCAACATCACACA     |
| mIL13 R         | 5' GGCCTGTAGATGGCATTGCA      |
| mTSLP F         | 5' AGCTTGTCTCCTGAAAATCGAG    |
| mTSLP R         | 5' AGGTTTGATTTCAGGCAGATGTT   |
| mTNF $\alpha$ F | 5' CATCTTCTCAAATTCGAGTGACAA  |
| mTNF $\alpha$ R | 5' TGGGAGTAGACAAGGTACAACCC   |
| mIL17a F        | 5' CCAGGGAGAGCTTCATCTGT      |
| mIL17a R        | 5' ACGTGGAACGGTTGAGGTAG      |
| mIL17c F        | 5' CACAGGAGACAGCATGAAGG      |
| mIL17c R        | 5' GCATCCACGACACAAGCA        |
| mIL17f F        | 5' AAGAAGCAGCCATTGGAGAA      |
| mIL17f R        | 5' ACAGAAATGCCCTGGTTTTG      |
| mIL22 F         | 5' CCGAGGAGTCAGTGCTAAGG      |
| mIL22 R         | 5' GCTGATGTGACAGGAGCTGA      |
| mEotaxin F      | 5' ATGCACCCTGAAAGCCATAG      |
| mEotaxin R      | 5' ATCCCTCAGAGCACGTCTT       |
| mWNT2 F         | 5' CCTGATGAACCTTCACAACAAC    |
| mWNT2 R         | 5' TCTTGTTTCAAGAAGCGCTTTAC   |
| mWNT2B F        | 5' GGGCCCTCATGAACTTACAC      |
| mWNT2B R        | 5' CCACTCACACCGTGACACTT      |
| mWNT4 F         | 5' ACTGGACTCCCTCCCTGTCT      |
| mWNT4 R         | 5' TGCCCTTGTCACTGCAAA        |
| mREDD1 F        | 5' TAGTGCCACCTTTCAGTTG       |

|             |                         |
|-------------|-------------------------|
| mREDD1 R    | 5' GTCAGGGACTGGCTGTAACC |
| mK5 F       | 5' ACCTCCTCACCCCTCTGAAC |
| mK5 R       | 5' CACTTGGTGTCCAGGACCTT |
| mTAT F      | 5' TTGGGGACCCTACTGTGTTT |
| mTAT R      | 5' GGAGCCTCAGGACAGTGGTA |
| mTNFRSF19 F | 5' CACACACATTTTGGGAAGG  |
| mTNFRSF19 R | 5' AAGAGAATGGCAGCGAAGAG |

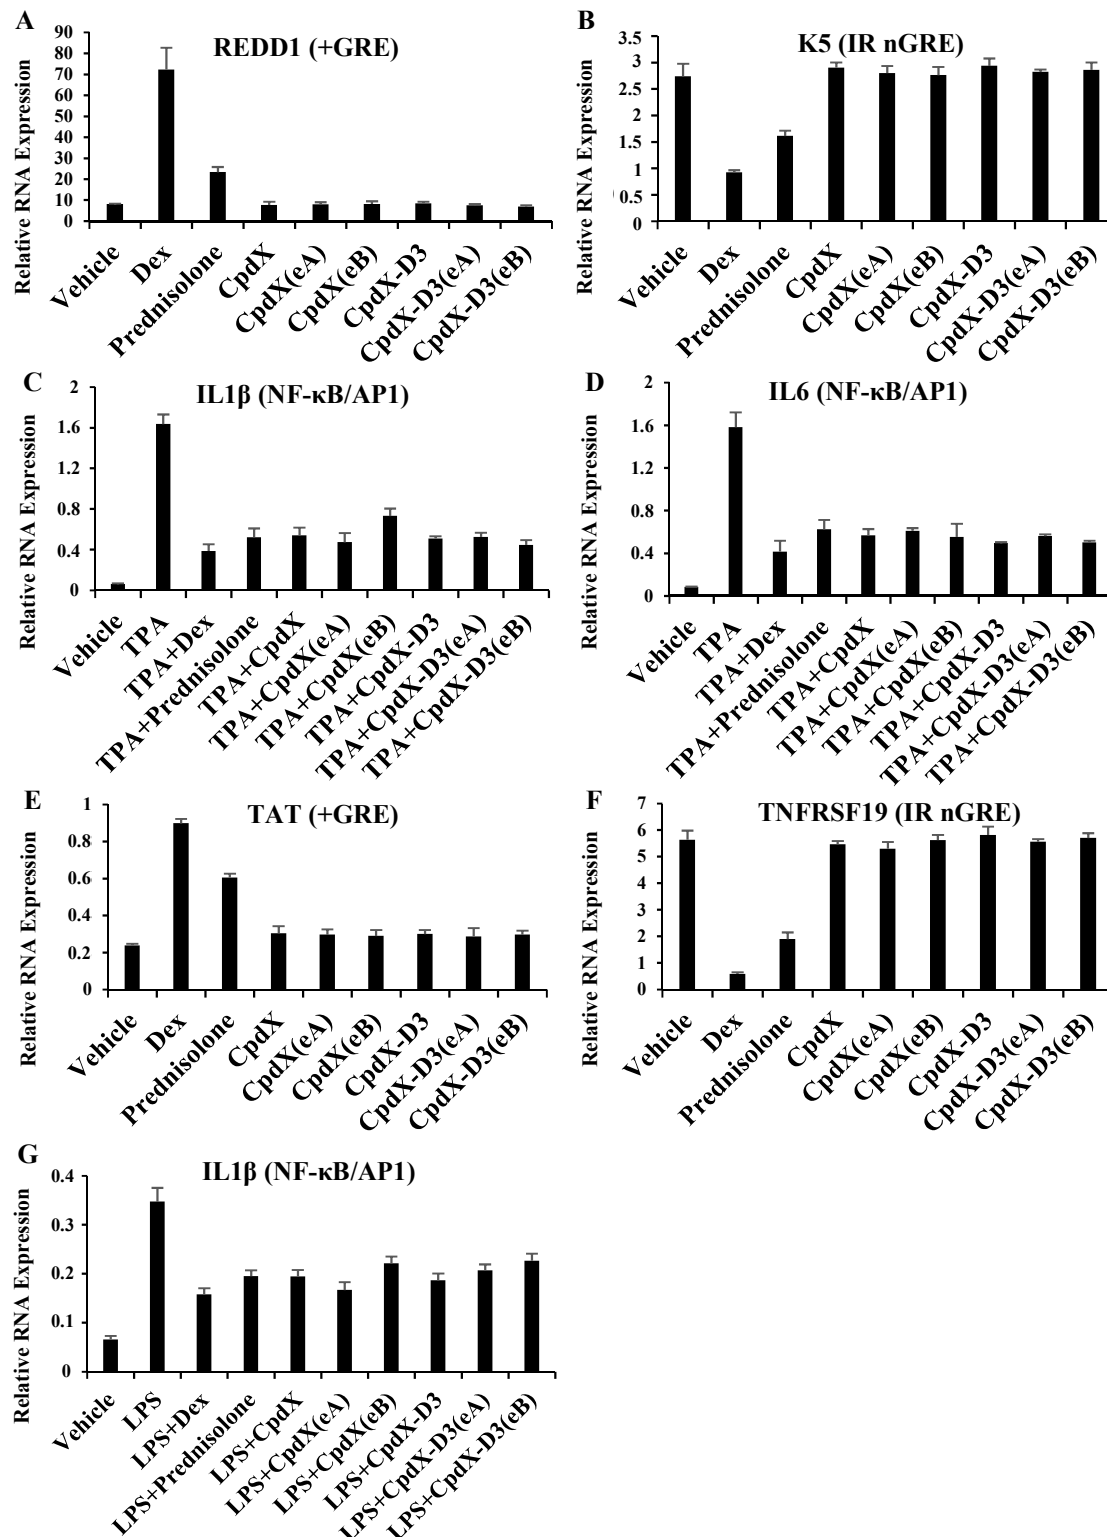

**Fig. S1. CpdX, CpdX-D3, and their respective enantiomers selectively activate the indirect transrepression function of GR.** Q-RT-PCR for transcripts of the (+)GRE-containing gene REDD1 (A), the IR nGRE-containing gene K5 (B), the NF $\kappa$ B/AP1-containing genes IL-1 $\beta$  (C) and IL-6 (D) in mouse ears treated as indicated (1 nmole/cm<sup>2</sup>); the (+)GRE-containing gene TAT (E), the IR nGRE-containing gene TNFRSF19 (F), the NF $\kappa$ B/AP1-containing genes IL-1 $\beta$  (G) in livers from mice intraperitoneally injected with either Dex, prednisolone or CpdX compounds (1mg/kg of body weight) without (E and F) or with Lipopolysaccharide (LPS) (10  $\mu$ g) (G) for 4 hours. All data are represented as mean  $\pm$  SEM of at least three independent experiments with at least three mice per treatment.



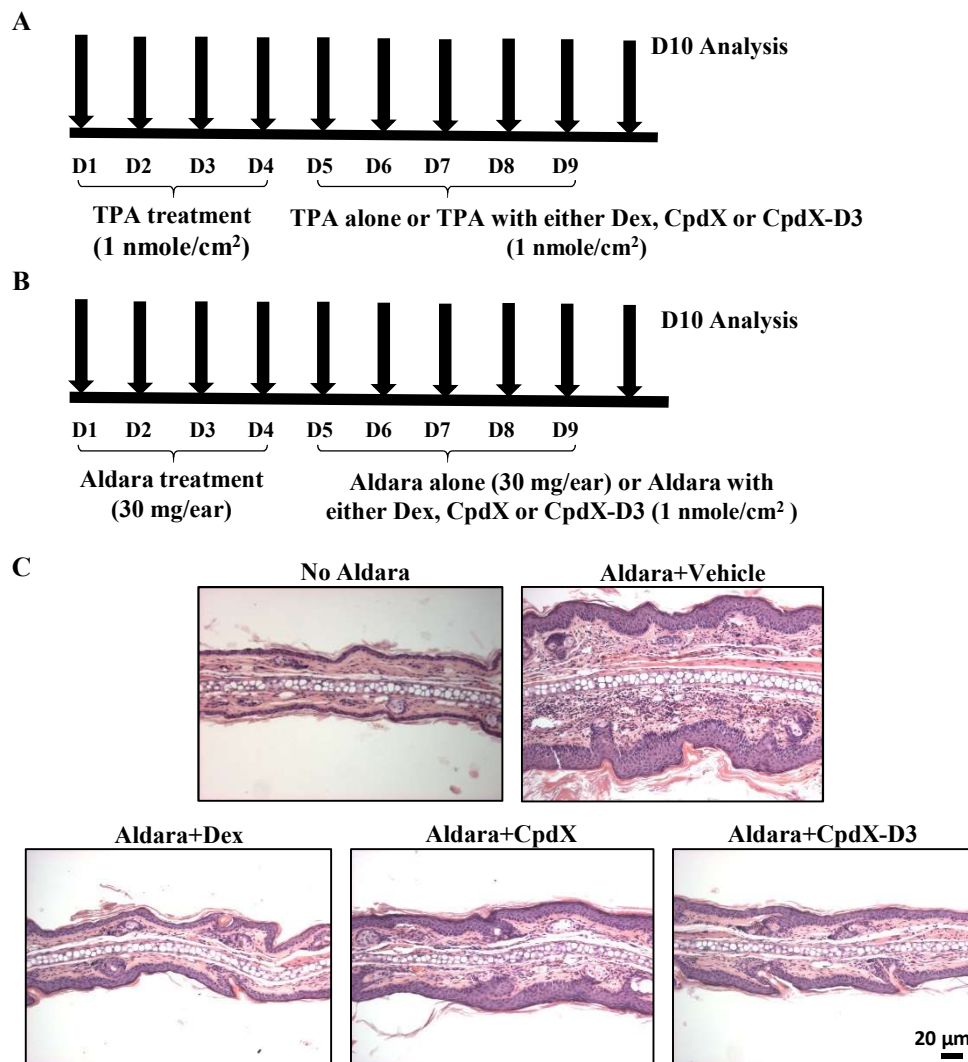

**Fig. S2. CpdX and CpdX-D3 are as efficient as Dexamethasone (Dex) at decreasing skin inflammations.** (A) Experimental protocol for a TPA-induced irritant contact dermatitis-like inflammation. (B) Experimental protocol for an Aldara-induced psoriasis-like inflammation. (C) Hematoxylin and eosin staining of an ear section from an Aldara-induced dermatitis. Scale bar represents 20 μm.

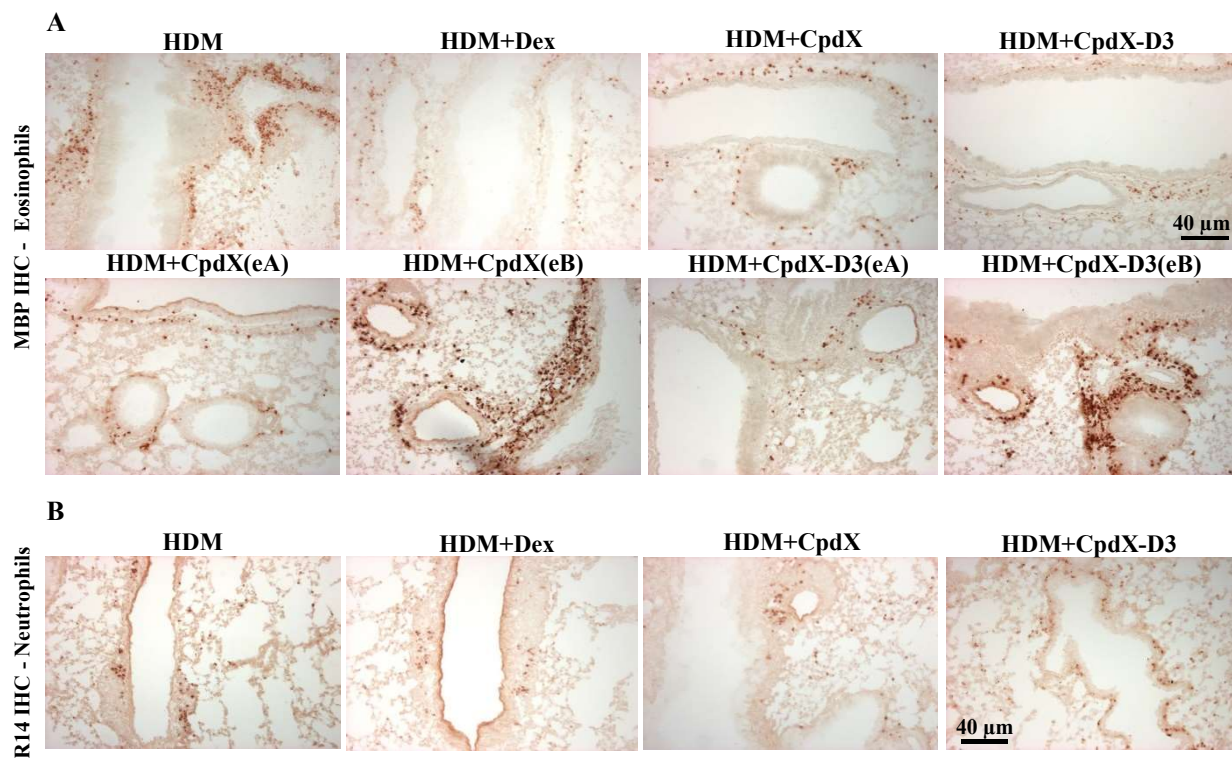

**Fig. S3. CpdX, CpdX(eA), CpdX-D3 and CpdX-D3(eA), but not CpdX(eB) nor CpdX-D3(eB), are as efficient as Dexamethasone (Dex) at decreasing an HDM-induced asthma-like lung allergic inflammation.** (A) Immunohistochemistry analyses of lung sections using the eosinophils specific antibody MBP. Scale bar represents 40 μm. (B) As in (A) but using the neutrophil specific antibody [NIMP-R14] (Abcam- ab2557).

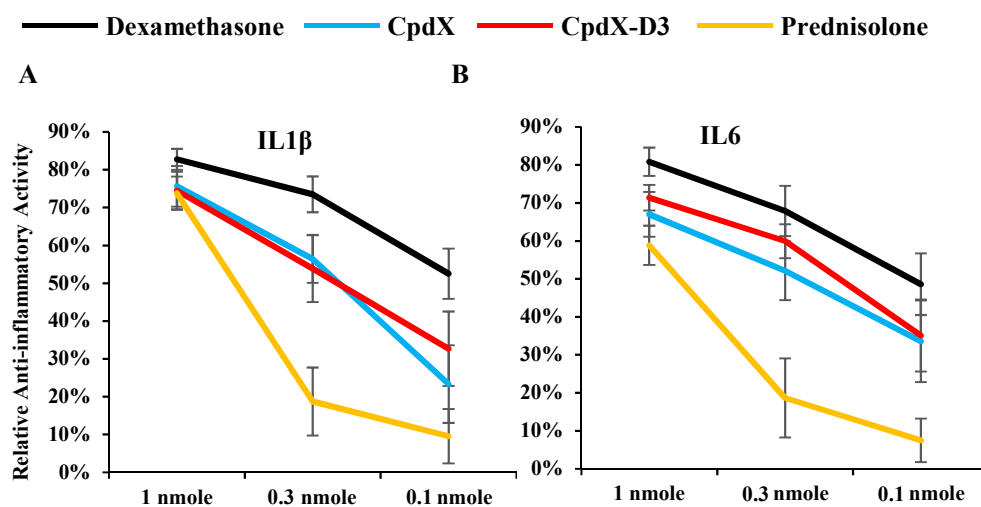

**Fig. S4. Relative Anti-inflammatory Potency of Dexamethasone (Dex), CpdX, CpdX-D3 or Prednisolone.** BALB/c mouse ears were topically treated overnight for 18 hours with 0.1 nmole/cm<sup>2</sup>, 0.3 nmole/cm<sup>2</sup> or 1 nmole/cm<sup>2</sup> of either Dex, CpdX, CpdX-D3 or Prednisolone. The values correspond to the tethered repression of IL-1 $\beta$  (A) or IL-6 (B) induced by either Dex, CpdX, CpdX-D3 or Prednisolone. All data are represented as mean  $\pm$  SEM of at least three independent experiments with at least three mice per treatment.
